# Supplementary material for: Modeling tree diversity, stand structure and productivity of northern temperate coniferous forests of Mexico
Source: PeerJ. 2019 Aug 14;7:e7051. doi: 10.7717/peerj.7051 (PMC6698128; doi:10.7717/peerj.7051)
Supplement: Supplemental Information 1 [file peerj-07-7051-s001.xls]

## Sheet: Hoja1
Diameter Structures 36 Sampling Plots 'Cielito Azul' Durango, Mexico by Jose Navar
Three sampling years 1982, 1993, and 2004.
				1982							1993							2004
P/D	5	15	25	35	45	55	65	5	15	25	35	45	55	65	5	15	25	35	45	55	65
1	8	36	23	8	1	3	0	25	27	21	11	2	3	1	52	39	23	10	5	3	2
2	206	201	0	0	0	0	0	154	332	2	0	0	0	0	143	354	20	0	0	0	0
3	24	72	32	16	1	0	0	66	80	29	23	3	0	0	83	82	27	20	7	0	0
4	50	87	24	22	4	1	0	81	92	21	25	6	3	0	102	100	20	20	12	4	0
5	36	93	25	5	0	0	1	83	133	27	8	0	0	0	114	136	35	10	1	0	0
6	85	82	13	5	4	0	0	96	183	26	6	5	0	0	144	155	33	4	7	2	0
7	34	89	28	7	0	1	0	75	97	40	12	1	0	2	92	112	40	22	2	0	2
8	53	89	32	15	8	3	0	74	102	22	26	6	1	1	102	107	26	21	11	1	1
9	60	64	21	6	1	2	0	82	91	20	16	1	2	0	99	101	32	14	5	2	0
10	34	70	36	10	1	0	0	87	68	29	18	2	0	0	106	71	37	18	4	0	0
11	104	134	14	23	8	1	0	130	168	21	17	13	2	0	129	181	29	12	14	4	0
12	231	310	8	0	0	0	0	189	388	40	1	0	0	0	245	262	79	6	1	0	0
13	73	52	18	9	13	1	4	102	73	16	11	6	6	4	119	104	21	13	5	8	4
14	64	88	33	31	3	4	1	100	99	33	29	9	3	2	119	124	31	24	17	7	2
15	96	105	26	14	4	4	0	113	136	23	20	7	4	0	122	127	36	18	9	3	2
16	76	169	4	1	0	0	0	99	235	19	2	0	0	0	154	202	41	5	1	0	0
17	60	102	42	20	6	2	2	91	122	36	19	8	3	0	121	135	36	19	17	3	0
18	46	69	26	8	2	3	4	69	98	26	11	0	4	1	118	111	32	12	3	1	1
19	44	68	37	22	6	1	5	66	74	38	22	8	4	3	82	75	37	23	12	5	2
20	99	129	44	15	5	6	3	133	186	56	12	8	3	2	165	172	66	16	7	5	3
21	74	100	28	14	8	4	3	121	107	32	15	8	5	2	127	137	33	22	8	6	4
22	69	209	25	0	0	0	0	47	192	84	11	1	0	0	94	121	101	17	4	0	0
23	125	155	13	8	4	0	4	145	176	22	11	4	2	4	192	179	34	10	8	3	3
24	52	108	21	17	2	1	6	92	122	19	20	6	1	7	102	145	24	14	16	1	8
25	46	76	47	29	12	0	3	73	75	47	30	16	0	3	83	91	40	26	19	6	1
26	82	54	45	29	9	2	2	88	65	43	23	12	4	2	105	73	41	25	12	6	2
27	38	65	50	17	6	3	1	56	69	50	14	11	5	1	75	77	44	25	9	7	4
28	64	101	50	18	9	4	0	70	109	49	23	12	5	1	80	125	47	27	13	6	2
29	90	122	26	25	6	3	2	76	154	39	24	12	4	3	82	154	53	21	16	3	5
30	151	275	8	0	0	0	0	134	326	52	1	0	0	0	128	303	79	9	0	0	0
31	57	66	17	11	8	4	3	65	90	19	14	6	4	6	73	116	17	15	9	5	4
32	113	221	9	0	1	0	0	92	268	44	2	1	0	0	105	236	72	12	0	1	0
33	38	73	20	9	1	2	3	71	109	19	9	4	2	1	72	127	31	10	5	2	1
34	122	42	14	9	2	4	3	66	140	24	13	2	4	3	68	136	43	13	2	4	5
35	110	58	18	13	7	6	3	114	124	22	10	13	5	5	118	148	22	12	13	7	6
36	186	38	13	7	6	4	5	111	157	17	11	4	3	5	115	175	29	8	3	4	9

## Sheet: Hoja2
Summary of Forestry Parameters 36 Sampling Plots measured in 1982, 1993, 2004
	Volumen total	Área Basal Total	Índice de Sitio	Edad	Densidad	Diam Prom
AñoRemed	(m3 ha-1)	(m2 ha-1)	(m a A=60 años	Años
2004	254.84	26.14	24	32	1179.33	14.3816
2004	441.51	35.21	29	41	1326.67	14.3395
2004	248.62	24.09	31	42	1284.67	14.6196
2004	476.06	37.89	41	53	1388.67	15.6699
2004	442.89	39.5	34	42	1282.67	17.5105
2004	383.79	34.77	39	46	1235.33	15.7364
1993	172.4	21.34	24	21	1049.33	15.0432
1993	294.21	33.26	29	30	1229.33	14.3992
1993	184.5	20.83	31	31	1092.67	14.9123
1993	368.32	32.19	41	42	1247.33	15.6715
1993	306.02	32.06	34	31	1187.33	17.4425
1993	284.74	28.08	39	35	1119.33	15.2208
1982	88.45	14.23	24	10	778.667	15.5233
1982	175.14	23.28	29	19	998	14.8327
1982	83.85	11.87	31	20	856.667	15.9202
1982	141.22	19.32	41	31	1022.67	15.9516
1982	148.56	20.13	34	20	1046.67	17.1534
1982	132.2	17.32	39	24	884	14.0383
